# Supplementary material for: Highly sensitive, non-invasive detection of colorectal cancer mutations using single molecule, third generation sequencing
Source: PubMed Central journal article supplement — Appl Transl Genom. 2015 Oct 16;7:32–9. doi: 10.1016/j.atg.2015.08.006 (PMC4803778; doi:10.1016/j.atg.2015.08.006), 2015-10-16
Supplement: mmc1.pdf [file mmc1.pdf]

# WT sample

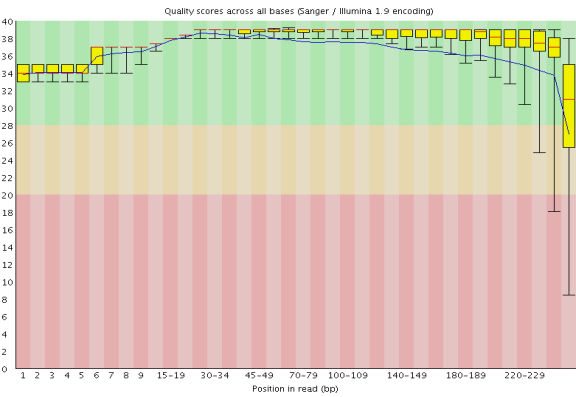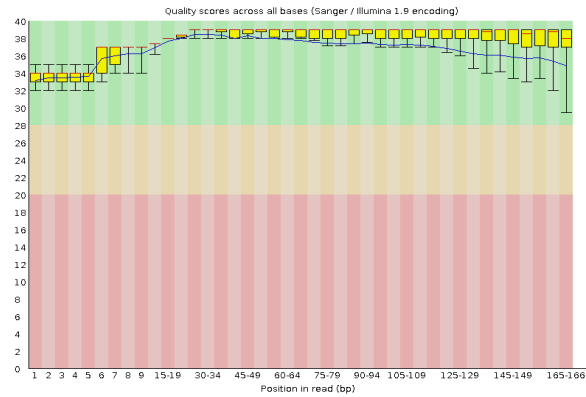

|                              |           |
|------------------------------|-----------|
| Total number of paired reads | 217,245   |
| Uncalled bases (%)           | 0.0       |
| Read length (bp)             | 250 + 250 |
| GC content (%)               | 43.5      |

# DLD1-mixed sample

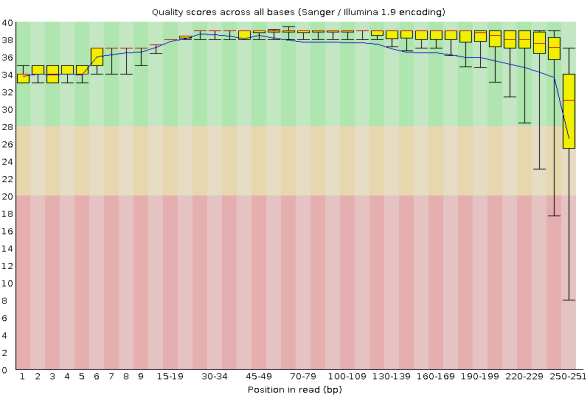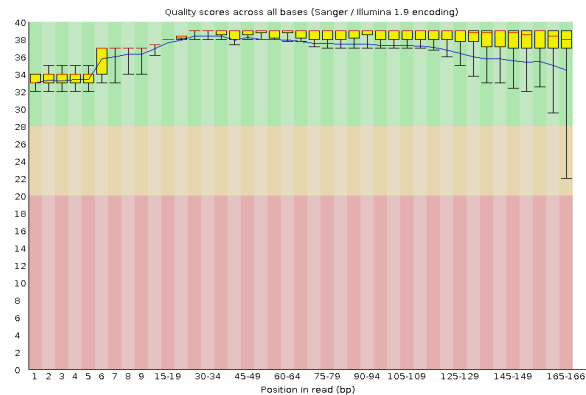

|                              |           |
|------------------------------|-----------|
| Total number of paired reads | 234,803   |
| Uncalled bases (%)           | 0.0       |
| Read length (bp)             | 250 + 166 |
| GC content (%)               | 43        |

Figure S1
