# Supplementary material for: Highly sensitive, non-invasive detection of colorectal cancer mutations using single molecule, third generation sequencing
Source: PubMed Central journal article supplement — Appl Transl Genom. 2015 Oct 16;7:32–9. doi: 10.1016/j.atg.2015.08.006 (PMC4803778; doi:10.1016/j.atg.2015.08.006), 2015-10-16
Supplement: mmc2.pdf [file mmc2.pdf]

## WT sample

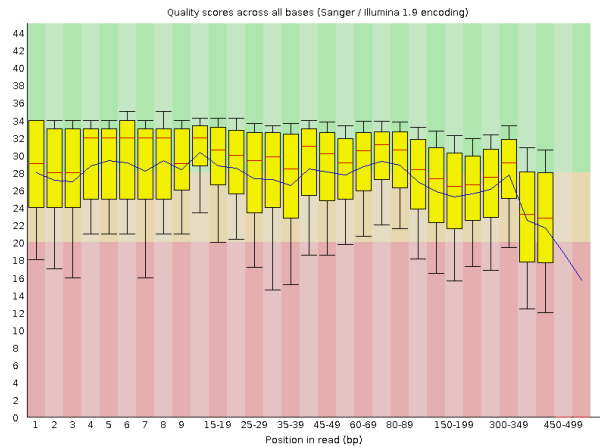

Total number of fragment reads 120,092

Uncalled bases (%) 0.0

Read length (bp) 8-512

GC content (%) 45

## DLD1-mixed sample

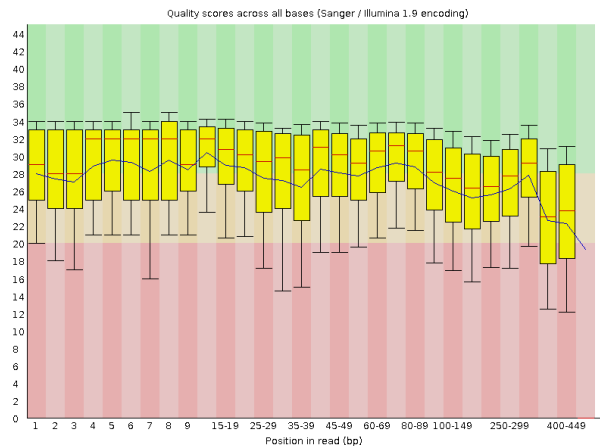

Total number of fragment reads 108,062

Uncalled bases (%) 0.0

Read length (bp) 8-491

GC content (%) 45

Figure S2
