# Supplementary material for: Highly sensitive, non-invasive detection of colorectal cancer mutations using single molecule, third generation sequencing
Source: PubMed Central journal article supplement — Appl Transl Genom. 2015 Oct 16;7:32–9. doi: 10.1016/j.atg.2015.08.006 (PMC4803778; doi:10.1016/j.atg.2015.08.006), 2015-10-16

**Reads Of Insert**

| Movie                                                        | Reads Of Insert | Read Bases Of Insert | Mean Read Length Of Insert | Read Accuracy Of Insert | Mean Number Of Passes |
|--------------------------------------------------------------|-----------------|----------------------|----------------------------|-------------------------|-----------------------|
| m130319_010527_42164_c10047419255000001823071406131314_s1_p0 | 15,014          | 4,954,794            | 330                        | 99.88%                  | 11.59                 |
| m130318_230854_42164_c10047419255000001823071406131313_s2_p0 | 14,013          | 4,620,112            | 329                        | 99.86%                  | 10.67                 |
| m130318_230854_42164_c10047419255000001823071406131313_s1_p0 | 14,148          | 4,668,254            | 329                        | 99.87%                  | 11.58                 |
| m130319_010527_42164_c10047419255000001823071406131314_s2_p0 | 14,527          | 4,792,923            | 329                        | 99.87%                  | 10.68                 |

**Read Length Of Insert**

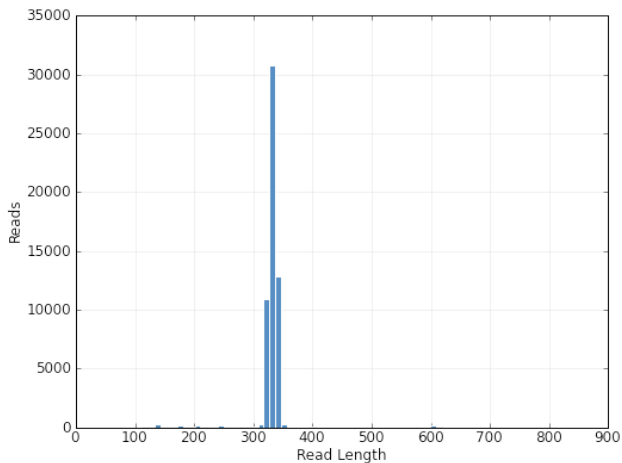

**Read Quality Of Insert**

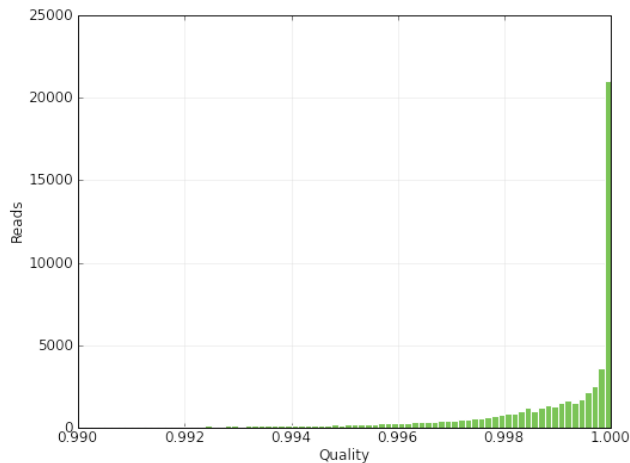

**Number Of Passes**

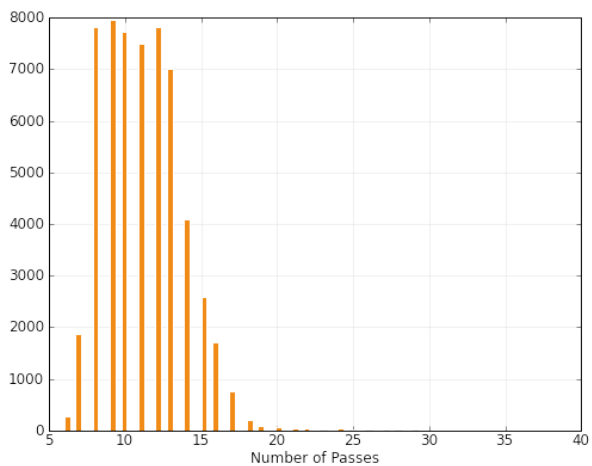

Supplement: mmc3.pdf [file mmc3.pdf]
