# Supplementary material for: Highly sensitive, non-invasive detection of colorectal cancer mutations using single molecule, third generation sequencing
Source: PubMed Central journal article supplement — Appl Transl Genom. 2015 Oct 16;7:32–9. doi: 10.1016/j.atg.2015.08.006 (PMC4803778; doi:10.1016/j.atg.2015.08.006), 2015-10-16

**Reads Of Insert**

| Movie                                                        | Reads Of Insert | Read Bases Of Insert | Mean Read Length Of Insert | Read Accuracy Of Insert | Mean Number Of Passes |
|--------------------------------------------------------------|-----------------|----------------------|----------------------------|-------------------------|-----------------------|
| m130318_211224_42164_c10047419255000001823071406131312_s1_p0 | 11,682          | 3,811,273            | 326                        | 99.84%                  | 11.67                 |
| m130318_211224_42164_c10047419255000001823071406131312_s2_p0 | 10,427          | 3,394,552            | 325                        | 99.8%                   | 10.77                 |
| m130318_191650_42164_c10047419255000001823071406131311_s2_p0 | 14,487          | 4,744,534            | 327                        | 99.86%                  | 10.98                 |
| m130318_191650_42164_c10047419255000001823071406131311_s1_p0 | 14,502          | 4,749,711            | 327                        | 99.87%                  | 11.73                 |

**Read Length Of Insert**

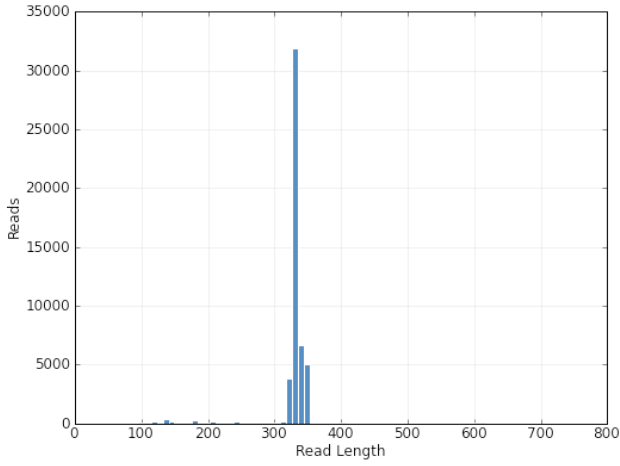

**Read Quality Of Insert**

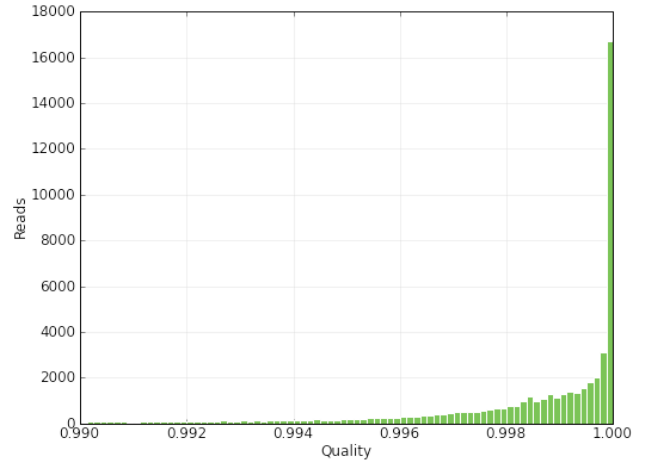

**Number Of Passes**

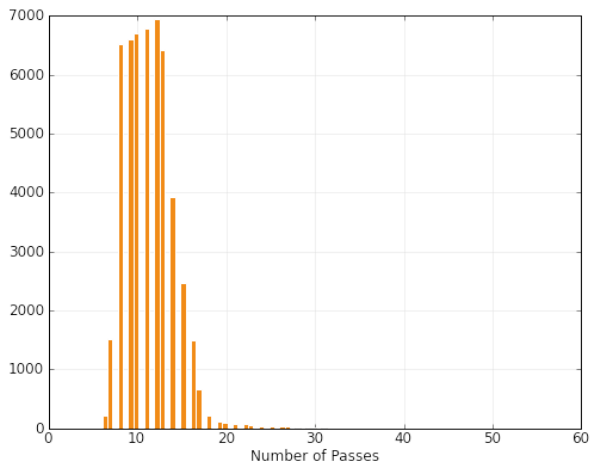

Supplement: mmc4.pdf [file mmc4.pdf]
