# Supplementary material for: Highly sensitive, non-invasive detection of colorectal cancer mutations using single molecule, third generation sequencing
Source: PubMed Central journal article supplement — Appl Transl Genom. 2015 Oct 16;7:32–9. doi: 10.1016/j.atg.2015.08.006 (PMC4803778; doi:10.1016/j.atg.2015.08.006), 2015-10-16

**Reads Of Insert**

| Movie                                                        | Reads Of Insert | Read Bases Of Insert | Mean Read Length Of Insert | Read Accuracy Of Insert | Mean Number Of Passes |
|--------------------------------------------------------------|-----------------|----------------------|----------------------------|-------------------------|-----------------------|
| m130522_024105_42164_c10052836255000001823083009281303_s1_p0 | 11,085          | 3,698,314            | 333                        | 99.93%                  | 13.24                 |
| m130522_024105_42164_c10052836255000001823083009281303_s2_p0 | 8,717           | 2,911,657            | 334                        | 99.94%                  | 12.29                 |

**Read Length Of Insert**

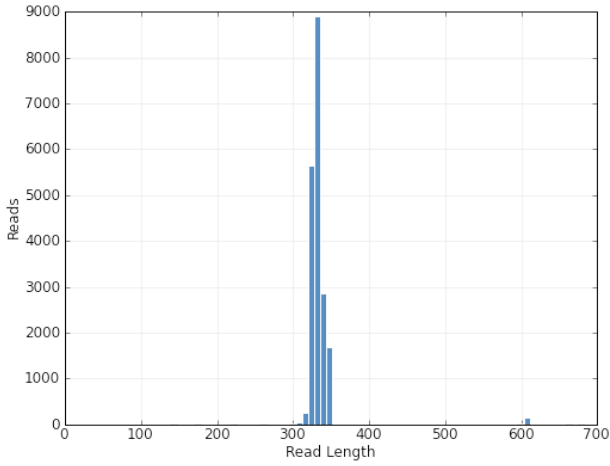

**Read Quality Of Insert**

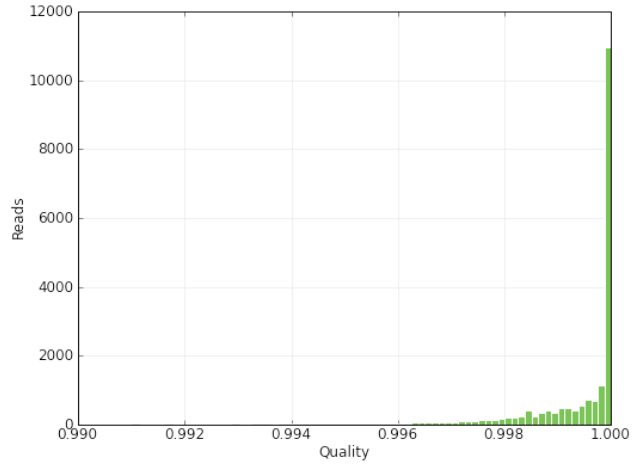

**Number Of Passes**

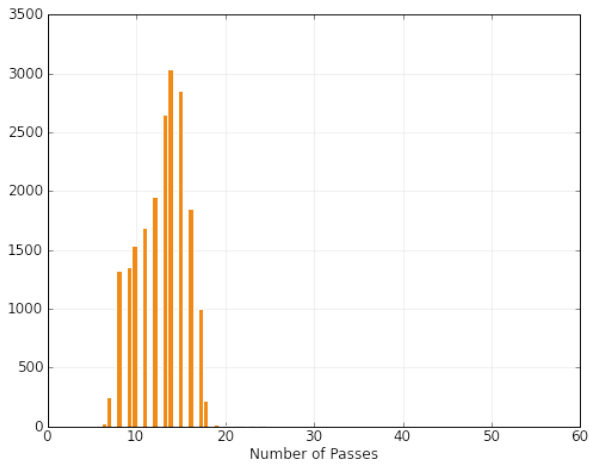

Supplement: mmc5.pdf [file mmc5.pdf]
