# Supplementary material for: Highly sensitive, non-invasive detection of colorectal cancer mutations using single molecule, third generation sequencing
Source: PubMed Central journal article supplement — Appl Transl Genom. 2015 Oct 16;7:32–9. doi: 10.1016/j.atg.2015.08.006 (PMC4803778; doi:10.1016/j.atg.2015.08.006), 2015-10-16

**Reads Of Insert**

| Movie                                                        | Reads Of Insert | Read Bases Of Insert | Mean Read Length Of Insert | Read Accuracy Of Insert | Mean Number Of Passes |
|--------------------------------------------------------------|-----------------|----------------------|----------------------------|-------------------------|-----------------------|
| m130522_004435_42164_c10052836255000001823083009281302_s2_p0 | 16,504          | 5,475,960            | 331                        | 99.91%                  | 12.36                 |
| m130522_004435_42164_c10052836255000001823083009281302_s1_p0 | 19,274          | 6,393,779            | 331                        | 99.91%                  | 13.06                 |

**Read Length Of Insert**

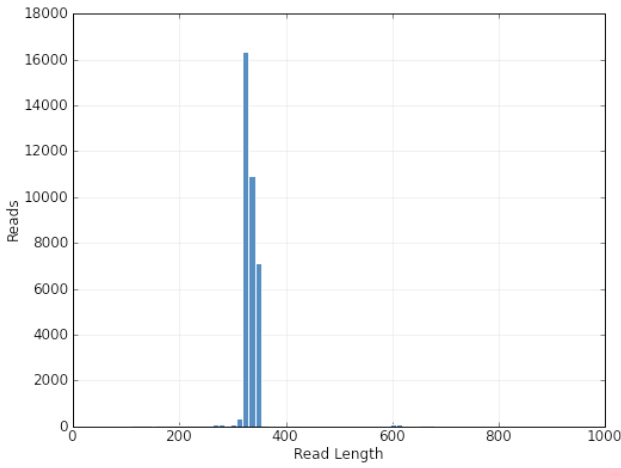

**Read Quality Of Insert**

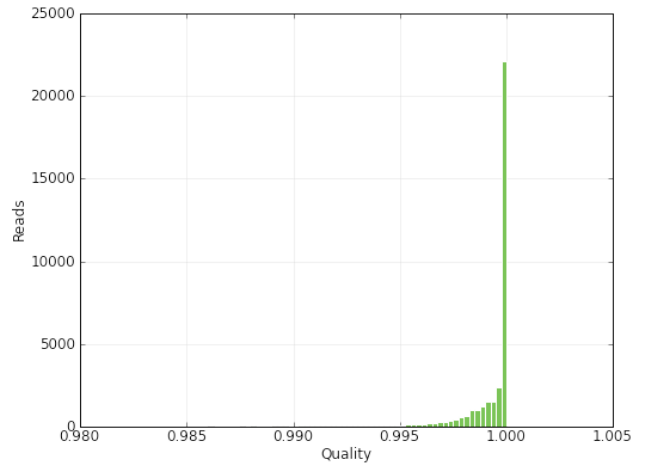

**Number Of Passes**

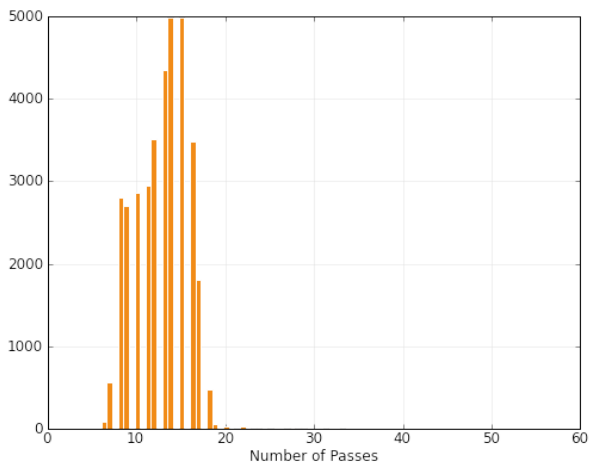

Supplement: mmc6.pdf [file mmc6.pdf]
