# Supplementary material for: Highly sensitive, non-invasive detection of colorectal cancer mutations using single molecule, third generation sequencing
Source: PubMed Central journal article supplement — Appl Transl Genom. 2015 Oct 16;7:32–9. doi: 10.1016/j.atg.2015.08.006 (PMC4803778; doi:10.1016/j.atg.2015.08.006), 2015-10-16

**Reads Of Insert**

| Movie                                                        | Reads Of Insert | Read Bases Of Insert | Mean Read Length Of Insert | Read Accuracy Of Insert | Mean Number Of Passes |
|--------------------------------------------------------------|-----------------|----------------------|----------------------------|-------------------------|-----------------------|
| m140108_000937_42164_c10058928255000001823099704281475_s1_p0 | 16,495          | 5,373,027            | 325                        | 100.0%                  | 33.22                 |

**Read Length Of Insert**

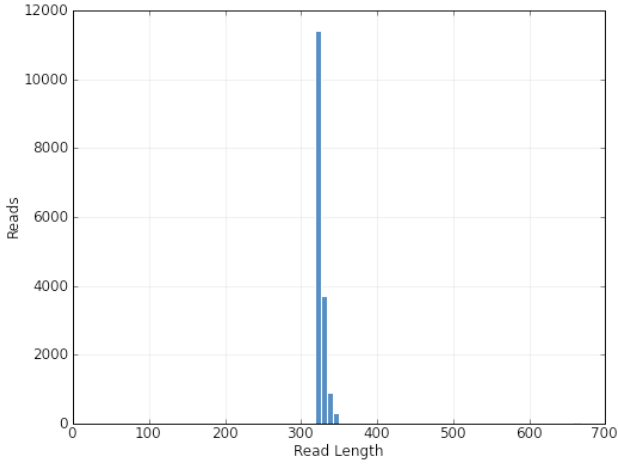

**Read Quality Of Insert**

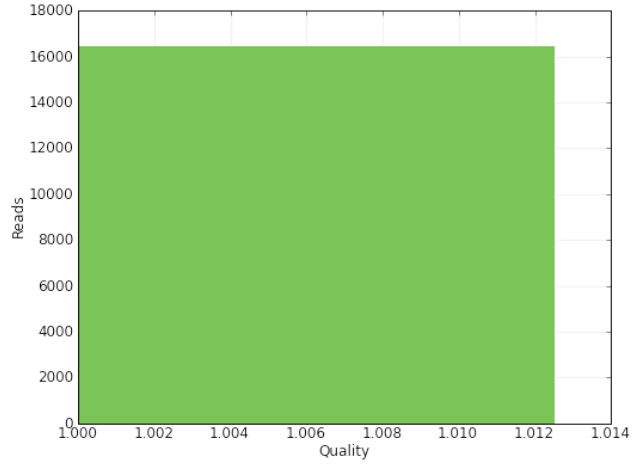

**Number Of Passes**

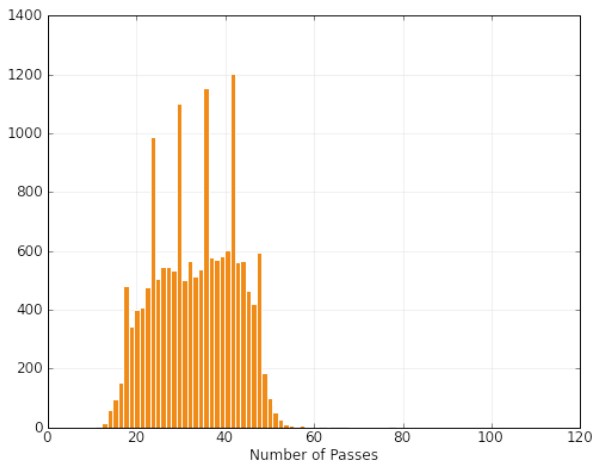

Supplement: mmc10.pdf [file mmc10.pdf]
