# Supplementary material for: Highly sensitive, non-invasive detection of colorectal cancer mutations using single molecule, third generation sequencing
Source: PubMed Central journal article supplement — Appl Transl Genom. 2015 Oct 16;7:32–9. doi: 10.1016/j.atg.2015.08.006 (PMC4803778; doi:10.1016/j.atg.2015.08.006), 2015-10-16
Supplement: mmc12.pdf [file mmc12.pdf]

## Supplementary Table 1.

### Experiment 1 : Putative mutations reported based on the sequencing run on the Illumina MiSeq

| Segment                | Relative position | RA       | AA       | Cov. WT     | AA Freq. WT (%) | Cov. DLD1-M | AA Freq. DLD1-M (%) | P             | Adj. P         |
|------------------------|-------------------|----------|----------|-------------|-----------------|-------------|---------------------|---------------|----------------|
| APC3                   | 147               | A        | G        | 8033        | 0.49            | 8014        | 1.9                 | 0             | 0              |
| APC7                   | 147               | A        | C        | 8004        | 0.07            | 8003        | 1.49                | 0             | 0              |
| APC7 (*)               | 94                | G        | -C       | 7999        | 0.03            | 7999        | 8.25                | 0             | 0              |
| KRAS (*)               | 214               | G        | A        | 8043        | 0.08            | 8047        | 1.43                | 0             | 0              |
| TP53_exon8             | 39                | T        | C        | 8019        | 3.49            | 8016        | 1.53                | 0             | 0              |
| APC8                   | 39                | C        | T        | 8012        | 3.95            | 8017        | 5.96                | 0             | 9.00E-06       |
| TP53_exon7             | 196               | A        | C        | 5059        | 11.09           | 4767        | 14.98               | 1.00E-06      | 1.60E-04       |
| TP53_exon7             | 147               | C        | A        | 6627        | 6.41            | 6822        | 8.50                | 2.10E-05      | 0.0066         |
| Beta_Catenin           | 91                | G        | A        | 8019        | 0.07            | 8015        | 0.37                | 6.80E-05      | 0.0225         |
| APC2                   | 198               | G        | T        | 8007        | 0.03            | 8003        | 0.28                | 8.70E-05      | 0.0297         |
| <i>TP53_exon7 (**)</i> | <i>161</i>        | <i>C</i> | <i>A</i> | <i>6058</i> | <i>5.28</i>     | <i>6331</i> | <i>0.72</i>         | <i>0.1741</i> | <i>57.6516</i> |

Note: (\*) True positive. (\*\*) False Negative. RA: Reference allele. AA: Alternative allele. WT: wild type. DLD1-M: DLD1 – mixed sample.
