# Supplementary material for: Highly sensitive, non-invasive detection of colorectal cancer mutations using single molecule, third generation sequencing
Source: PubMed Central journal article supplement — Appl Transl Genom. 2015 Oct 16;7:32–9. doi: 10.1016/j.atg.2015.08.006 (PMC4803778; doi:10.1016/j.atg.2015.08.006), 2015-10-16
Supplement: mmc13.pdf [file mmc13.pdf]

## Supplementary Table 2.

### Experiment 1 : Putative mutations reported based on the sequencing run on the IonTorrent PGM

| Segment       | Relative position | RA | AA | Cov. WT | AA Freq. WT (%) | Cov. DLD1-M | AA Freq. DLD1-M (%) | P       | Adj. P  |
|---------------|-------------------|----|----|---------|-----------------|-------------|---------------------|---------|---------|
| APC7          | 1                 | G  | T  | 7871    | 11.43           | 7897        | 7.48                | 0       | 0       |
| APC7          | 233               | G  | A  | 7818    | 10.42           | 7517        | 14.52               | 0       | 0       |
| APC7 (*)      | 94                | G  | -C | 7897    | 0.05            | 7856        | 0.54                | 0       | 0       |
| KRAS          | 63                | G  | C  | 7868    | 0.69            | 7929        | 0.13                | 0       | 2e-06   |
| APC7          | 221               | T  | A  | 7298    | 15.42           | 6802        | 11.73               | 0       | 3e-06   |
| TP53_exon7    | 239               | A  | +A | 7766    | 6.10            | 7758        | 8.62                | 0       | 3e-06   |
| TP53_exon7    | 25                | C  | A  | 6797    | 17.44           | 6905        | 13.42               | 0       | 3e-06   |
| TP53_exon7    | 50                | C  | T  | 6679    | 11.09           | 6644        | 8.24                | 1e-06   | 5.6e-05 |
| APC7          | 186               | C  | -G | 5354    | 4.42            | 5268        | 2.65                | 2e-06   | 0.0007  |
| APC7          | 97                | T  | A  | 7933    | 0.01            | 7916        | 0.26                | 1.1e-05 | 0.0037  |
| APC7          | 31                | G  | T  | 7958    | 3.69            | 7955        | 12.46               | 1.3e-05 | 0.0043  |
| TP53_exon7    | 114               | T  | -G | 7787    | 852             | 7734        | 8.8                 | 5.8e-05 | 0.0192  |
| TP53_exon7(*) | 161               | C  | T  | 7770    | 10.94           | 7779        | 0.26                | 0.0001  | 0.0496  |
| KRAS (**)     | 214               | G  | A  | 5590    | 0.19            | 5204        | 0.36                | 0.1032  | 34.0272 |

Note: (\*) True positive. (\*\*) False Negative. RA: Reference allele. AA: Alternative allele. WT: wild type. DLD1-M: DLD1 – mixed sample.
